# Supplementary material for: PdAg alloy nanoparticles immobilized on functionalized MIL-101-NH2: effect of organic amines on hydrogenation of carbon dioxide into formic acid
Source: Royal Society of Chemistry journal article supplement (doi:10.1039/d1nj00460c), 2021-01-01
Supplement: d1nj00460c1.pdf [file d1nj00460c1.pdf]

## Supporting information

### PdAg Alloy Nanoparticles Immobilized on Functionalized MIL-101-NH<sub>2</sub>: Effect of Organic

#### Amines for Hydrogenation of Carbon Dioxide into Formic Acid

Lingfei Xu,<sup>a</sup> Tianchen Cui,<sup>a</sup> Juan Zhu,<sup>a,b</sup> Xinkui Wang,<sup>a</sup> Min Ji<sup>a\*</sup>

<sup>a</sup> Department of Chemistry, School of Chemical Engineering, Dalian University of Technology, Dalian 116023, China

<sup>b</sup> Luzhou North Chemical Industries Co., Luzhou 646000, China

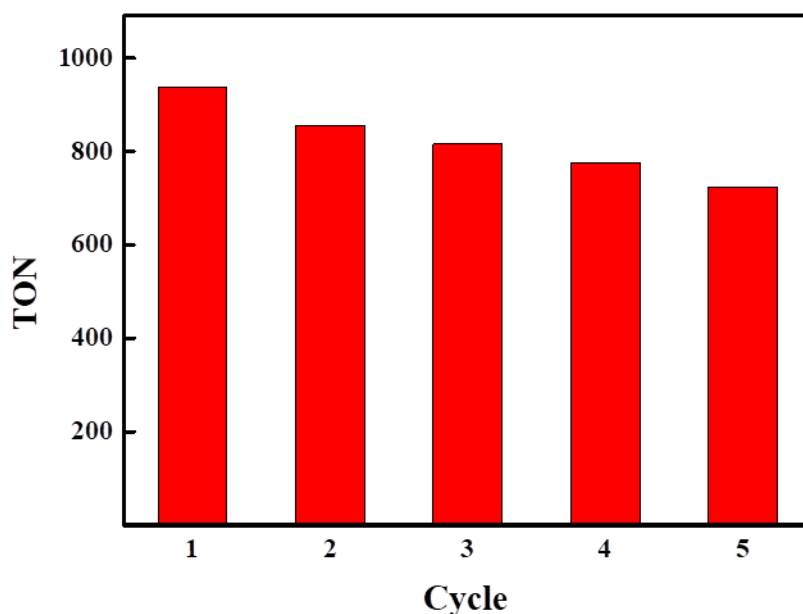

Fig. S1. Recyclability of PdAg/TEDA-MIL-101-NH<sub>2</sub> catalyst during the hydrogenation of CO<sub>2</sub> into formic acid. Reaction condition: 20 mg catalyst, the total pressure of 5.0 MPa (CO<sub>2</sub> : H<sub>2</sub> = 1 : 1, volume ratio) at 70 °C for 10 h.

We further investigated the reason for the deterioration of catalyst activity by using ICP-AES, XRD, TEM and FT-IR. The Pd contents in fresh catalyst and recycled catalyst after 5 times respectively were 1.77 wt% and 1.59 wt%. The XRD patterns of fresh catalyst and recycled catalyst were shown as Fig. S2 and it noted that PdAg/TEDA-MIL-101-NH<sub>2</sub> was stable during this

reaction. Unfortunately, the particle size of PdAg NPs in recycled catalyst were analyzed by TEM and results as shown in Fig. S3, part of PdAg NPs had agglomeration and the average of MNPs was  $\sim 7.3$  nm. And FT-IR results as shown in Fig. S4, the skeleton characteristic peak of MIL-101-NH<sub>2</sub> and the loaded organic base characteristic peak all still were observed in the recycled catalyst, which indicated catalyst support was unchanged. However, peak at  $3370\text{ cm}^{-1}$  signed to -NH<sub>2</sub> was emerged after reaction and it was because of the small number of losing and clusters of noble metals. Therefore, basically it can be determined that the cause of catalyst activity loss was the increase of MNPs size.

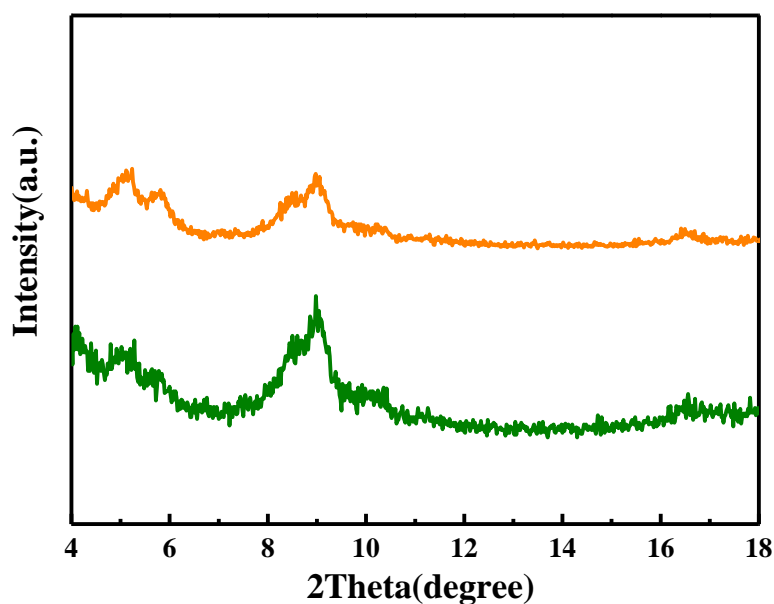

Fig. S2. The PXRD pattern of PdAg/TEDA-MIL-101-NH<sub>2</sub> fresh (green) and recycled (yellow) catalysts.

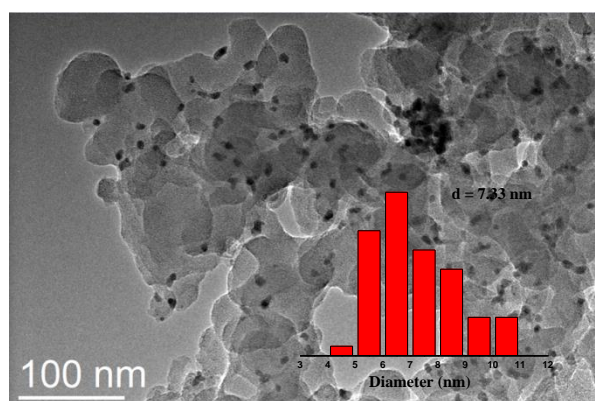

Fig. S3. The TEM of PdAg/TEDA-MIL-101-NH<sub>2</sub> recycled catalyst

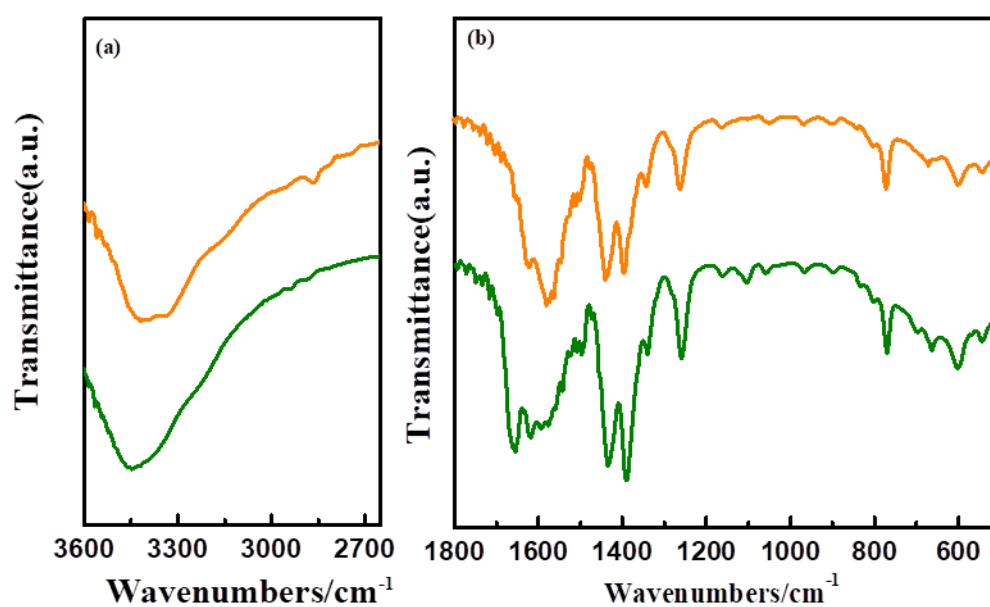

Fig. S4. Partial enlarged view of fresh and recycled catalysts FT-IR spectra. (a) High wavenumbers; (b) Low wavenumbers of fresh PdAg/TEDA-MIL-101-NH<sub>2</sub> (green); recycled PdAg/TEDA-MIL-101-NH<sub>2</sub> (yellow)

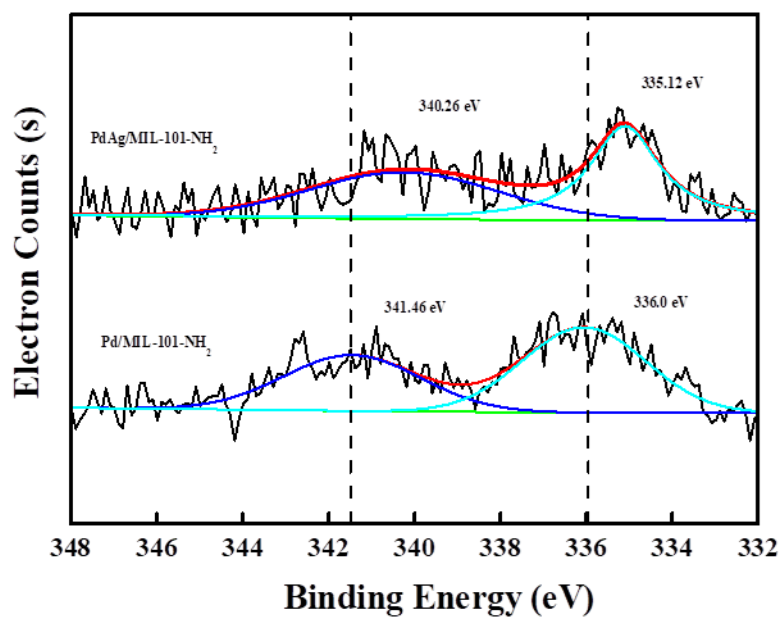

Fig. S5. The Pd 3d XPS of Pd/MIL-101-NH<sub>2</sub> and PdAg/MIL-101-NH<sub>2</sub>.
